# Supplementary material for: Investigating the Conformational Stability of Prion Strains through a Kinetic Replication Model
Source: PubMed Central journal article supplement (PMC2697384; doi:10.1371/journal.pcbi.1000420), 2009-07-03
Supplement: pcbi.1000420.s001.pdf [file pcbi.1000420.s001.pdf]

## Plot of Table 4

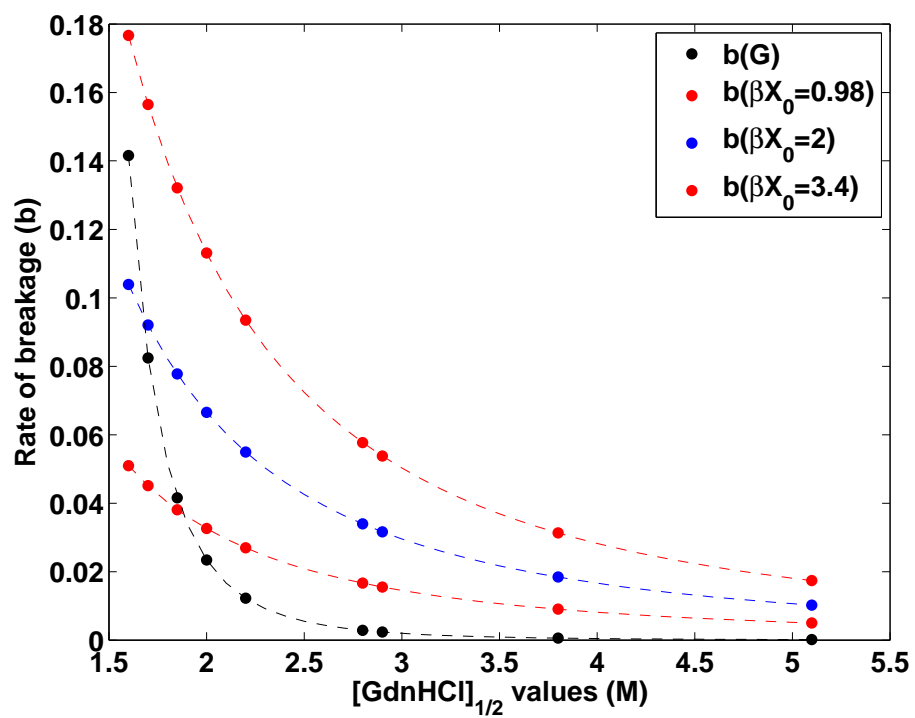

Figure S1:  $b(G)$  and  $b(\beta X_0)$ : Results obtained in Table 4 in the main text are here visualized.
