# Supplementary material for: Investigating the Conformational Stability of Prion Strains through a Kinetic Replication Model
Source: PubMed Central journal article supplement (PMC2697384; doi:10.1371/journal.pcbi.1000420), 2009-07-03
Supplement: pcbi.1000420.s003.pdf [file pcbi.1000420.s003.pdf]

## Incubation time ( $t_G$ ) vs stability ( $G$ ) and rate of growth ( $r$ )

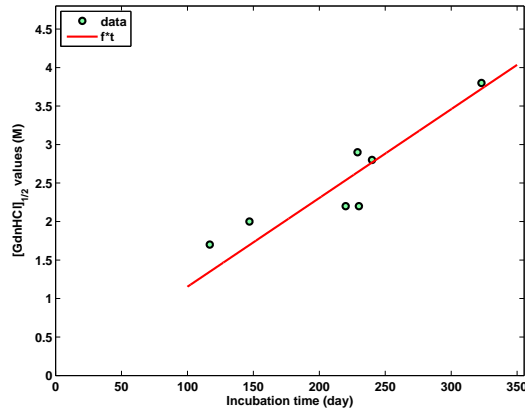

(a)

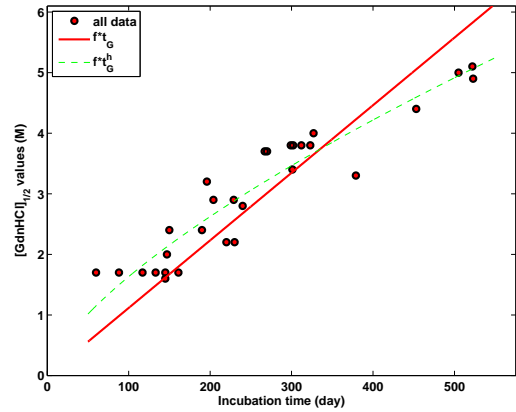

(b)

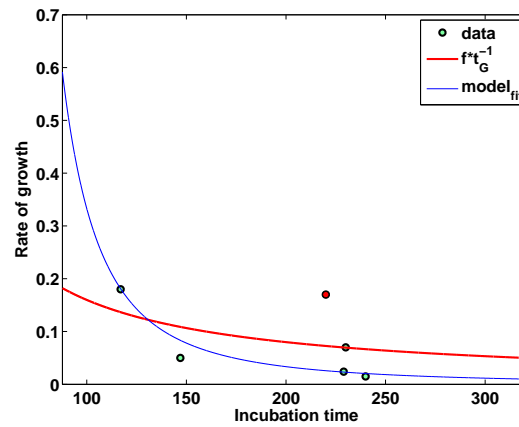

(c)

## Incubation time ( $t_G$ ) vs stability ( $G$ ) and rate of growth ( $r$ ).

In [1] a direct linear proportionality between the resistance of different strains to denaturation ( $G$ ) and the incubation time ( $t_G$ ) is reported. In Fig. S0 (a) we repropose this linear dependence between  $G$  and  $t_G$  for the strains listed in Table 2 of the main manuscript (see Table S1). The more stable a prion is, the longer is its incubation time. Synthetic prions, provide us with the opportunity to explore this relationship in a wider range of stability values than when considering only natural prion strains [2]. The regression of the entire dataset reported in [1] (see panel (b)) reveals that the linear (red line) and the non linear (dashed green line) model have comparable fitting performances, see Table S2. Natural and synthetic strains separately are directly proportional to their respective incubation times  $t_G$  (see again [1]). However, the best fitting of the combined dataset is obtained for the non-linear model

(green dashed line, Table S2). As the highly stable strains have long incubation times, also the age factor should probably be taken into account. The  $t_G$  of Fig. S0 (a) are clearly function of  $G$  and hence provide information on the growth rate of each strain. However, the  $t_G$  of [1] do not carry any information about inoculum dose, and as such cannot be directly used to infer  $r$  according to the method described in [3] (see also the Material and Methods section of our manuscript). For this reason, we decided to use the values of  $r$  (and  $R_0$ ) available from the literature, not based on the  $t_G$  of [1]. In panel (c), then, we investigate the relationship between these stability-based incubation time  $t_G$ , and the estimated rates of growth  $r$  (Table 2 of the main manuscript). Qualitatively, an inverse relationship is emerging, as expected. However, this relationship is not exactly of the type occurring between  $r$  and  $t_d$  ( $r \sim 1/t_d$ ). In Table S2 we show that this particular relationship is not “optimally” reproducing the experimental data, as can be anticipated by concatenating the various best fitting carried out in the paper:  $R_0$  from  $r$ ,  $G$  from  $R_0$  (and finally here  $G$  from  $t_G$ ). Relating  $r$  to  $t_G$  through this chain of models, we obtain an improved fitting, although still below the level of significance (p-value is in Table S2). This may be due to the presence of an outlier (marked in red). Neglecting this outlier, the model predictions are associated to a p-value less than 0.05 (p-value=0.0318), while the simpler inverse relationship ( $r \sim 1/t_G$ ) is still below the level of significance (p-value=0.0742).

| Prion strain     | $G$ (M) | Incubation time $t_G$ (days) |
|------------------|---------|------------------------------|
| 139A             | 2       | 147                          |
| ME7              | 2.9     | 229                          |
| BSE              | 2.8     | 240                          |
| RML              | 1.7     | 117                          |
| MK4985           | 3.8     | 323                          |
| Chandler Scrapie | 2.2     | 220                          |
| 301V             | 2.2     | 230                          |

Table S1: **Estimated empirical parameters for different prion strains.** The estimated values for the stability against denaturation and the incubation time  $t_G$  for different prion strains are shown. Notice that the incubation times  $t_G$  are not corresponding to those used to infer  $r$  and  $R_0$  (denoted  $t_d$  in the manuscript).

| Relationship     | Estimated parameters                   | R-square | p.value       |
|------------------|----------------------------------------|----------|---------------|
| $G$ vs $t_G$ (a) | $0.0114 t_G$                           | 0.84     | 0.004         |
| $G$ vs $t_G$ (b) | $0.0696 t_G^{0.685}$                   | 0.874    | $4.12e^{-14}$ |
|                  | $0.01115 t_G$                          | 0.724    | $8.32e^{-14}$ |
| $r$ vs $t_G$     | $(0.107 t_G^{0.685} - 1.4112)^{-2.63}$ | -        | 0.2353        |
|                  | $15.99/t_G$                            | -        | 0.3374        |

Table S2: Fitted values for the curves in Fig. S0

## References

- [1] G Legname, H O Nguyen, D Peretz, F E Cohen, S J DeArmond, and S B Prusiner. Continuum of prion protein structures enciphers a multitude of prion isolate-specified phenotypes. *Proc Natl Acad Sci U S A*, 103(50):19105–19110, Dec 2006.
- [2] G Legname, I V Baskakov, H O Nguyen, D Riesner, F E Cohen, S J DeArmond, and S B Prusiner. Synthetic mammalian prions. *Science*, 305(5684):673–676, Jul 2004.
- [3] J Masel, V A Jansen, and M A Nowak. Quantifying the kinetic parameters of prion replication. *Biophys Chem*, 77(2-3):139–152, Mar 1999.
